# Supplementary material
Source: Springer Nature journal article supplement (https://www.springermedizin.de/resource/supplementary/13054_2010_9292_MOESM2_ESM.pdf/9734122)

## DAY 0

### RISK FACTORS FOR RESISTANT ORGANISMS

Antibiotics within the prior 30 days of diagnosis of nosocomial pneumonia  
Patient hospitalized >5 days before the diagnosis of nosocomial pneumonia was made  
Bronchiectasis  
Known family member with multidrug-resistant pathogen  
Documented colonization with resistant organisms  
Patient hospitalized for 2 days or more within prior 90 days of the diagnosis of nosocomial pneumonia was made  
Residence in a nursing home or extended care facility  
Chronic dialysis within the prior 30 days, home infusion therapy (including antibiotics), or home wound care  
Immunosuppression (cancer, AIDS, ESRD, end stage liver disease, end stage COPD, steroids, chemotherapy/radiotherapy)

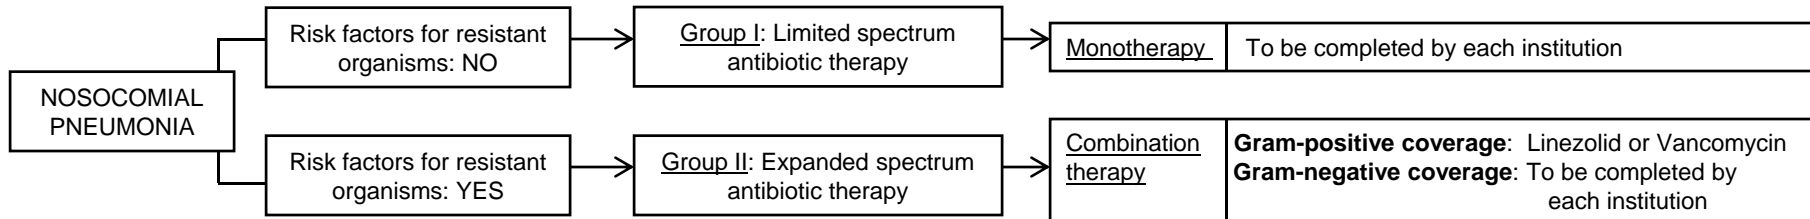

## DAY 3

### CRITERIA FOR SHORT COURSE THERAPY OF NOSOCOMIAL PNEUMONIA

Clinical Pulmonary Infection Score (CPIS)  $\leq 6$  on day 0 and day 3  
No severe sepsis or shock on any day  
No immunosuppression (e.g chemotherapy-induced neutropenia, other immunosuppressive state, transplant, or splenectomy patients)

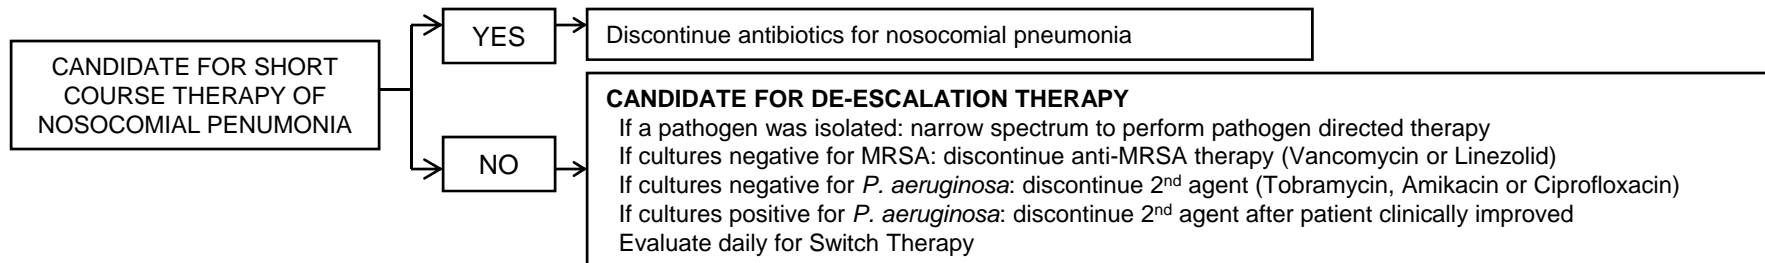

## DAY 8

### CRITERIA FOR DISCONTINUATION OF ANTIBIOTICS

(daily evaluation)  
Patient clinically improved  
No *P. aeruginosa* isolated  
No *Acinetobacter* isolated

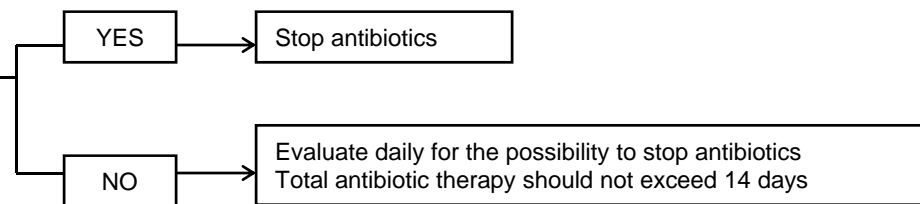

Supplement: MOESM2 [file 9734122]
